# Supplementary material for: Inhibition of RAS-driven signaling and tumorigenesis with a pan-RAS monobody targeting the Switch I/II pocket
Source: PubMed Central journal article supplement — Proc Natl Acad Sci U S A. 2022 Oct 17;119(43):e2204481119. doi: 10.1073/pnas.2204481119 (PMC9618066; doi:10.1073/pnas.2204481119), 2022-10-17
Supplement: pnas.2204481119.sapp.pdf [file pnas.2204481119.sapp.pdf]

## Supplementary Information for Inhibition of RAS-driven signaling and tumorigenesis with a pan-RAS monobody targeting the Switch I/II pocket

Lauren Wallon<sup>a,1</sup>, Imran Khan<sup>b,c,1</sup>, Kai Wen Teng<sup>a</sup>, Akiko Koide<sup>a,d</sup>, Mariyam Zuberi<sup>b,c</sup>, Jianping Li<sup>e</sup>,  
Gayatri Ketavarapu<sup>a</sup>, Nathaniel J. Traaseth<sup>e</sup>, John P. O'Bryan<sup>b,c,2</sup>, Shohei Koide<sup>a,f,2</sup>

<sup>a</sup>Laura and Isaac Perlmutter Cancer Center, New York University Langone Health, New York, NY 10016

<sup>b</sup>Department of Cell and Molecular Pharmacology and Experimental Therapeutics, Hollings Cancer Center, Medical University of South Carolina, Charleston, SC 29425

<sup>c</sup>Ralph H. Johnson VA Medical Center, Charleston, SC 29401

<sup>d</sup>Department of Medicine, New York University School of Medicine, New York, NY 10016

<sup>e</sup>Department of Chemistry, New York University, New York, NY, 10003

<sup>f</sup>Department of Biochemistry and Molecular Pharmacology, New York University School of Medicine, New York, NY 10016

<sup>1</sup>These authors contributed equally to this work.

<sup>2</sup>Correspondence to: Shohei Koide and John P. O'Bryan

**Email:** Shohei.Koide@nyulangone.org; obryanjo@muscc.edu

### This PDF file includes:

Figures S1 to S12

Tables S1 to S3

SI References

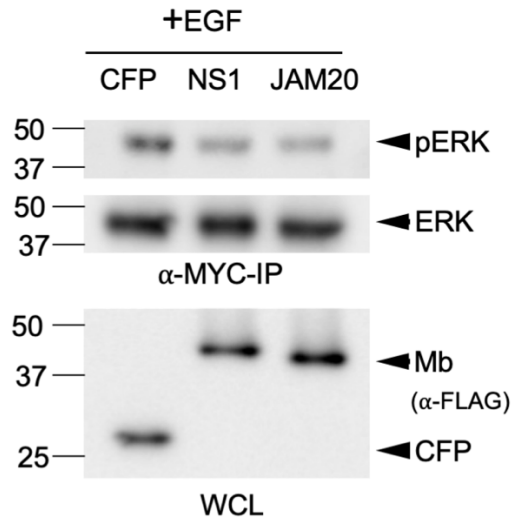

**Fig. S1.** Effect of CFP-JAM20 on EGF-stimulated ERK-MAPK activation in HEK293 cells. CFP-FLAG and CFP-NS1 were used as controls.

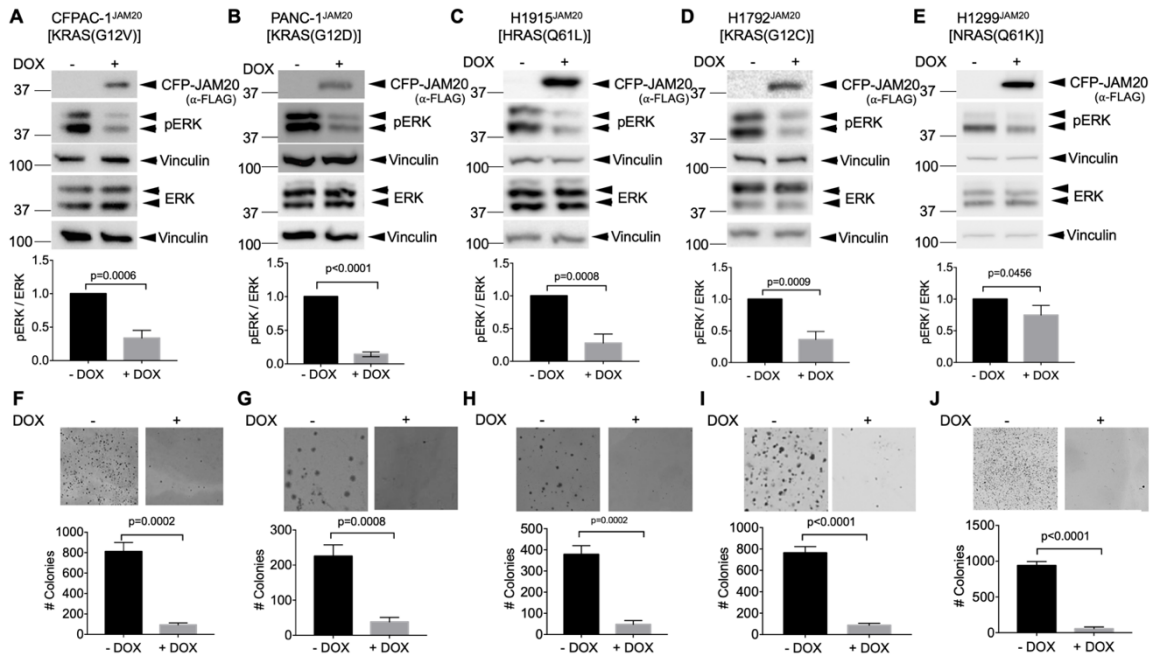

**Fig. S2.** DOX-regulated JAM20 expression inhibits signaling and growth of RAS mutant human tumor cell lines. a-e. Doxycycline (DOX) inducible JAM20 expressing stable lines were generated from RAS mutant tumor cells. ERK activation was then measured  $\pm$ DOX treatment by Western blot analysis for pERK levels. The mutant RAS protein expressed in each tumor line is indicated above the panels. Vinculin expression was used as a control for loading. JAM20 expression reduced anchorage independent growth of RAS mutant human tumor cells. Engineered JAM20 cells were plated on soft agar in the absence (-) or presence (+) of DOX and allowed to grow for 3-4 weeks. f) CFPAC-1<sup>JAM20</sup>, KRAS(G12V) mutant human pancreatic ductal adenocarcinoma tumor; g) PANC-1<sup>JAM20</sup>, KRAS(G12D) mutant human pancreatic ductal adenocarcinoma tumor; h) H1915<sup>JAM20</sup>, HRAS(Q61L) mutant human lung tumor; i) H1792<sup>JAM20</sup>, KRAS(G12C) mutant human lung cancer cells; j) H1299<sup>JAM20</sup>, NRAS(Q61K) lung cancer cells. Graphs represent the average colony number from three wells  $\pm$  s.d. Colonies were counted using NIH ImageJ software. Images are representative wells from each assay. *P* values were determined by comparison of colony numbers between - and +DOX conditions using a student's t-test.

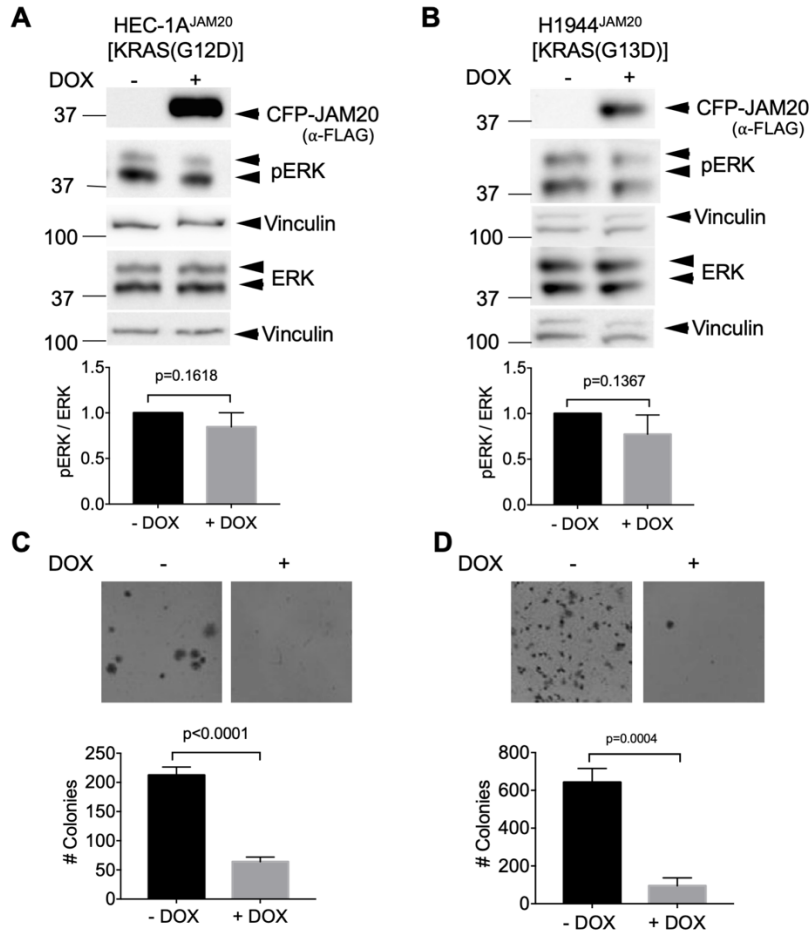

**Fig. S3.** Evaluating DOX-regulated JAM20 expression on signaling and growth of RAS mutant human tumor cell lines. (A-B) Doxycycline (DOX) inducible JAM20 expressing stable lines were generated from RAS mutant tumor cells. ERK activation was then measured  $\pm$ DOX treatment by Western blot analysis for pERK levels. The mutant RAS protein expressed in each tumor line is indicated above the panels. Vinculin expression was used as a control for loading. (C-D) JAM20 expression reduced anchorage independent growth of RAS mutant human tumor cells. Engineered JAM20 cells were plated on soft agar in the absence (-) or presence (+) of DOX and allowed to grow for 3-4 weeks. (C) HEC-1A<sup>JAM20</sup>, KRAS(G12D) mutant human endometrial adenocarcinoma tumor; (D) H1944<sup>JAM20</sup>, KRAS(G13D) mutant human non-small cell lung carcinoma tumor. Graphs represent the average colony number from three wells  $\pm$  s.d. Colonies were counted using NIH ImageJ software. Images are representative wells from each assay. *P* values were determined by comparison of colony numbers between - and +DOX conditions using a student's t-test.

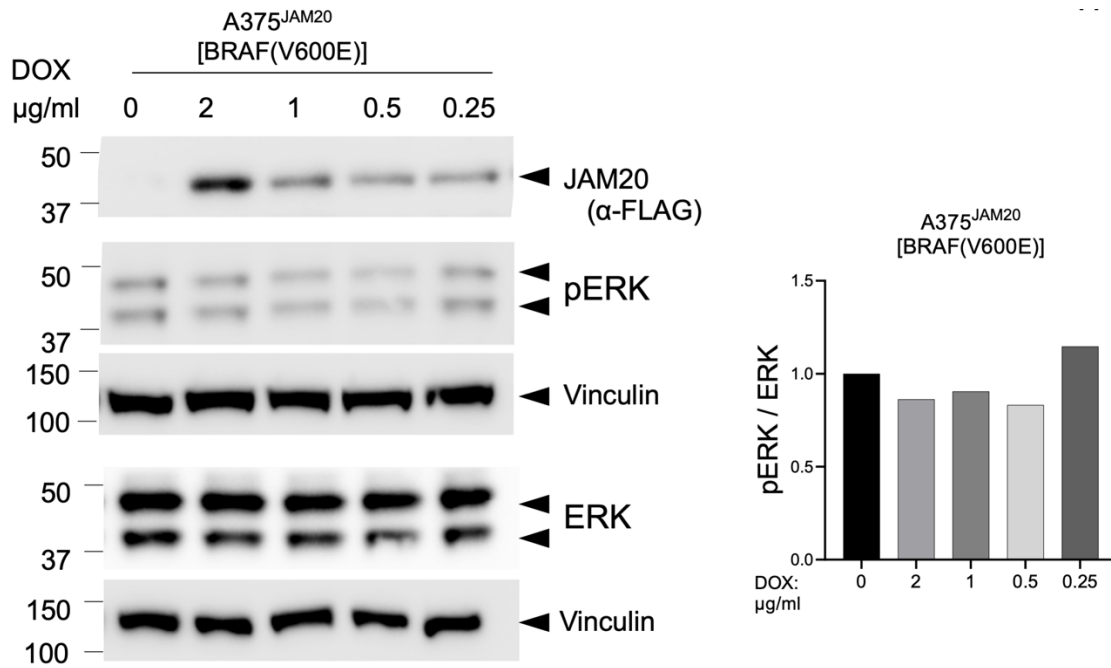

**Fig. S4.** Titration of DOX induced JAM20 expression on ERK-MAPK signaling in BRAF(V600E) mutant A375 melanoma cells. Experiments were performed as described in Fig. S2 A-E.

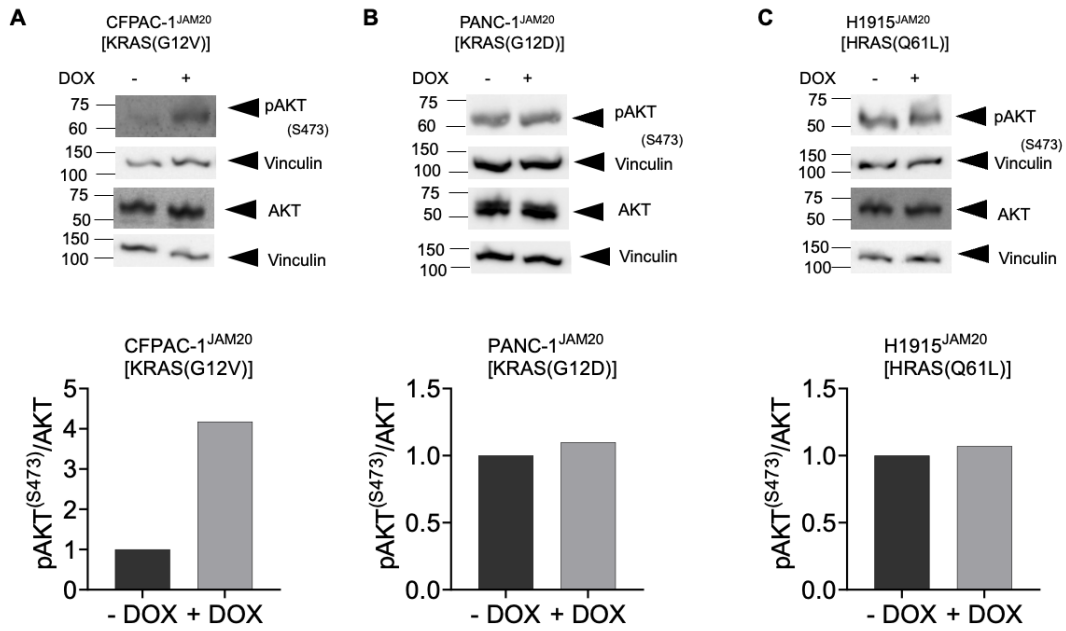

**Fig. S5.** Effect of JAM20 expression on AKT activation in 2D growth conditions. Experiments were performed as in Fig. S2 A-E, but blots were probed for AKT activation using phospho-specific AKT antibodies (pAKT<sup>S473</sup>).

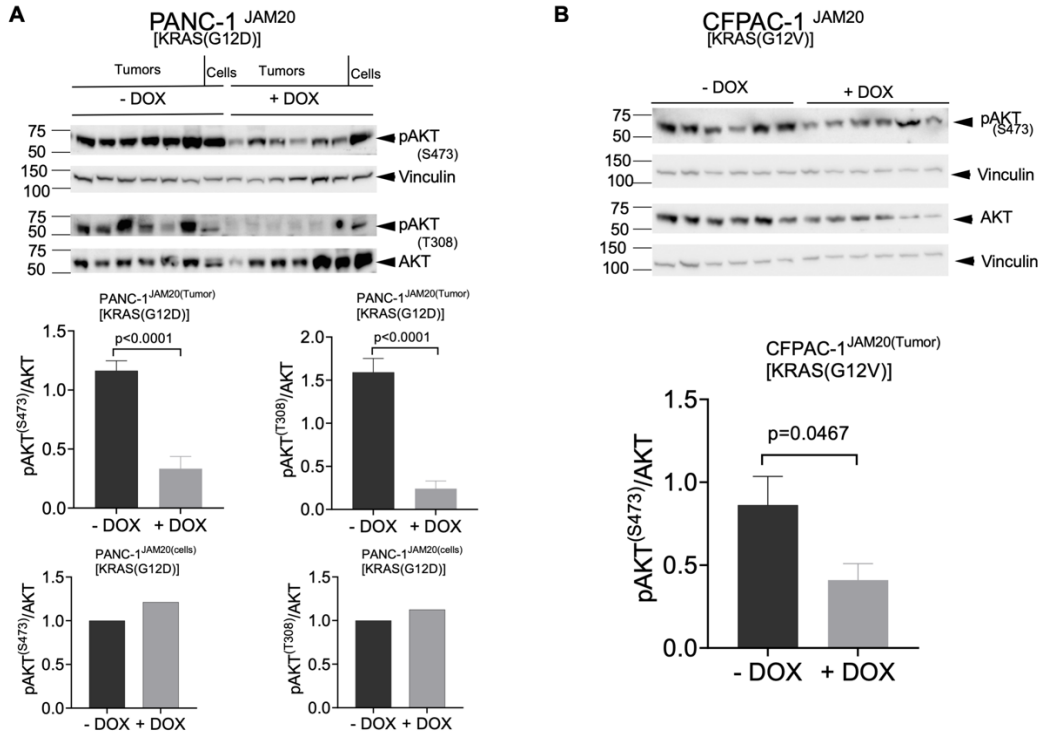

**Fig. S6.** Effect of JAM20 expression on AKT activation in tumor lysates as shown in Fig. 3a-b. Athymic nude mice were injected subcutaneously in the flanks with either (A) PANC-1<sup>JAM20</sup> or (B) CFPAC-1<sup>JAM20</sup> cells. Mice were divided into two cohorts treated without (-) or with (+) DOX and monitored for tumor development.

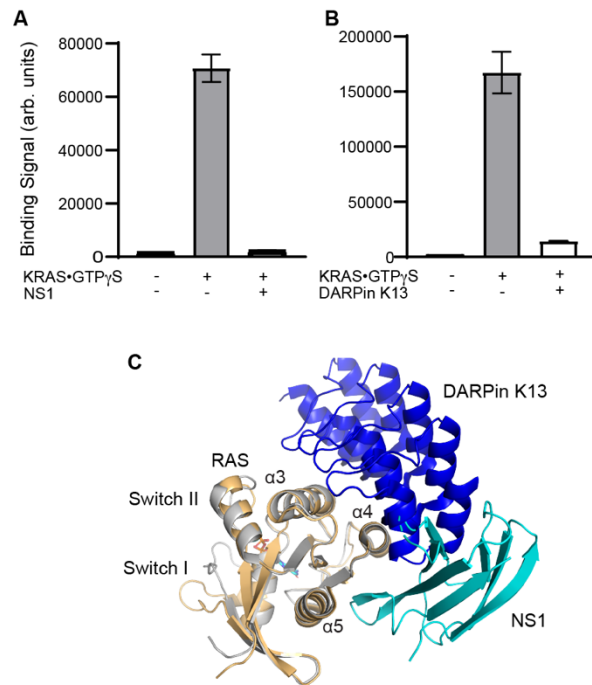

**Fig. S7.** Competitive binding of NS1 and DARPin K13. Binding of 100nM biotinylated KRAS(WT)•GTP $\gamma$ S to NS1 displayed on the yeast surface in the presence and absence of 1  $\mu$ M purified NS1 (a) or DARPin K13 (b) was measured using flow cytometry. The mean and s.d. of three technical replicates are plotted. c) Overlay of the DARPin K13-KRAS(WT)•GDP complex (PDB ID 6H46) and NS1-HRAS(WT)•GDP complex (PDB ID 5E95) using the RAS structures as the reference.



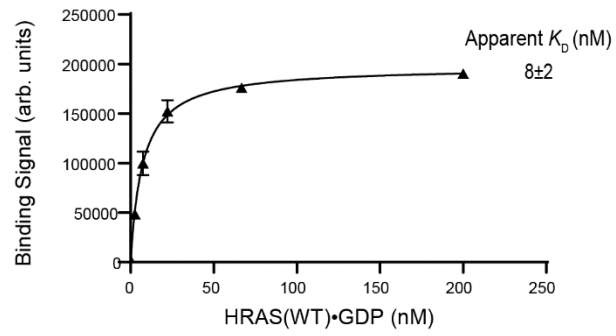

**Fig. S8.** Binding titration measurements of JAM20(Y83S) against HRAS(WT)•GDP using yeast display. The mean and s.d. of three technical replicates are plotted.

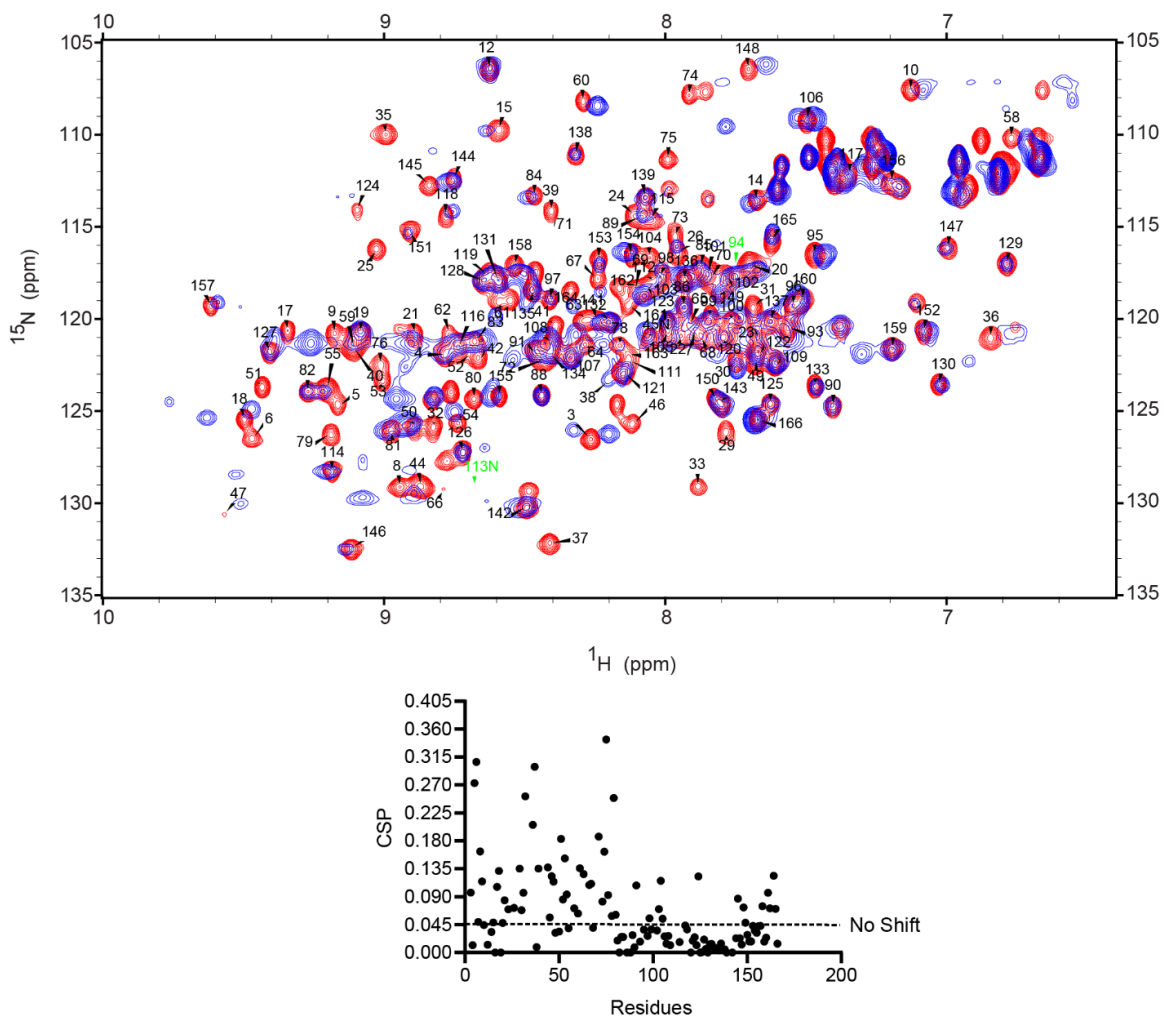

**Fig. S9.** Spectra for HSCQ-NMR. HRAS(WT)- Only spectra is shown in red and HRAS(WT) complexed with JAM20(Y83S) is shown in purple. Chemical shift perturbation (CSP) plot shows assigned residues where the cut-off for movement was placed at 0.045. The following residues were not unambiguously assigned in the spectra and consequently not included in this plot: 11, 22, 24, 25, 29, 35, 40, 41, 42, 49, 59, 62, 64, 65, 69, 70, 72, 85, 94, 92, 96, 100, 101, 111, 112, 113, 115, 116, 119, 134, 141, 143, 163.

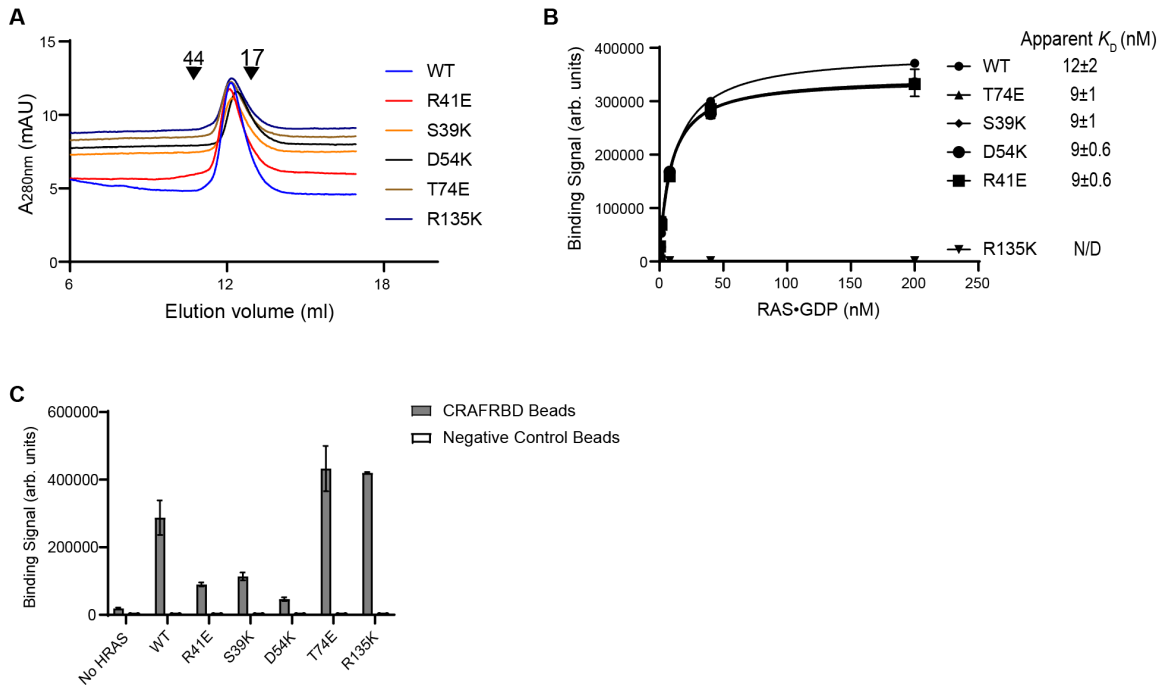

**Fig. S10.** Assessing HRAS variants. (A) Size-exclusion chromatography analysis. Five  $\mu\text{M}$  of HRAS-WT or 2.9  $\mu\text{M}$  of HRAS variant (R41E, S39K, D54K, T74E or R135K) were injected into a Superdex S75 10/300 column and the absorbance at 280 nm was detected. The arrows with 44 and 17 represent the elution positions of molecular weight standards.  $n=1$ . (B) Evaluating the structural integrity of HRAS variants via NS1 binding. Binding of purified HRAS mutants to NS1 on the yeast surface was measured using flow cytometry. The mean and s.d. of three technical replicates are plotted. ND, Not Determined. (C) Binding of RAF(RBD) binding to HRAS variants. Binding of purified HRAS•GTP $\gamma$ S variants (250 nM) to biotinylated RAF(RBD) immobilized on streptavidin M280 beads was measured using flow cytometry. The mean and s.d. of three technical replicates are plotted.

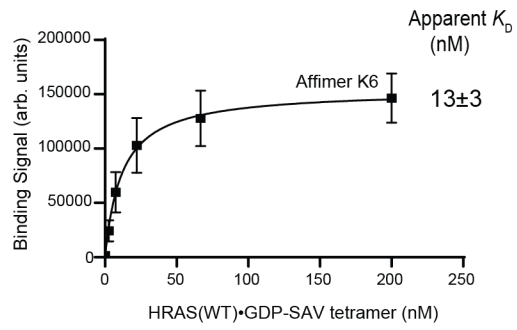

**Fig. S11.** Binding titration of HRAS(WT)•GDP precomplexed with streptavidin to affimer K6 displayed on yeast surface. The use of the HRAS-streptavidin complex results in substantial affinity enhancement due to multivalent interactions, which enables the detection of weak interactions. The HRAS concentration is expressed in terms of the HRAS monomer.

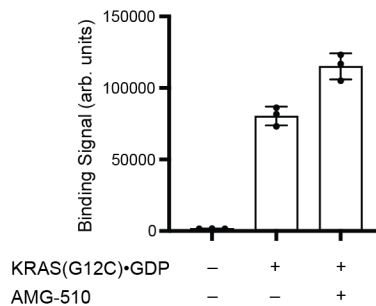

**Fig. S12.** Effect of AMG-510 conjugation to KRAS(G12C)•GTP on the binding of JAM20 as tested in the yeast display format. JAM20 was displayed on the yeast surface. KRAS(G12C)•GDP was treated with AMG-510 prior to the binding measurements. The final concentration of KRAS(G12C) was 8 nM. The graph shows the mean and s.d. of technical triplicates, representative of n=2 independent experiments.

**Table S1.** Amino acid sequences of monobodies used in this study

| Construct           | Amino acid sequence                                                                                                                                                                                                                                                                                                                                                                                                                                                             |
|---------------------|---------------------------------------------------------------------------------------------------------------------------------------------------------------------------------------------------------------------------------------------------------------------------------------------------------------------------------------------------------------------------------------------------------------------------------------------------------------------------------|
| JAM20               | VSSVPTKLEVVAATPTSLLISWDASSSSVSYYRITYGETGGNSPVQEF TVPSYYSTAT<br>ISGLKPGVDY TITVYAYYWYGSPYYYWKASPISINYRT                                                                                                                                                                                                                                                                                                                                                                          |
| Mb(Neg)             | VSSVPTKLEVVAATPTSLLISWDASSSSVSYYRITYGETGGNSPVQEF TVPGSKSTAT<br>ISGLKPGVDY TITVYASSSSSSSSSSSSKPIPISINYRT                                                                                                                                                                                                                                                                                                                                                                         |
| pHBT-JAM20          | <u>MKHHHHHHSSGLNDIFEAQKIEWHEENLYFQ</u> GSVSSVPTKLEVVAATPTSLLISWDAS<br>SSSVSYYRITYGETGGNSPVQEF TVPSYYSTATISGLKPGVDY TITVYAYYWYGSPYY<br>YWKASPISINYRT (N-terminal tag is underlined; TEV cleavage occurs C-<br>terminal to the ENLYFQ sequence)                                                                                                                                                                                                                                   |
| ECFP-FLAG-<br>JAM20 | <u>MVSKGEELFTGVVPILVELDGDVNGHKFSVSGEGEGDATYGKLT LKFICTTGKLPVPW</u><br><u>PTLVTTLTWGVQCFSRYPDHMKQHDFFKSAMPEGYVQERTIFFKDDGNYKTRAEVKFE</u><br><u>GDTLVNRIELKGIDFKEDGNILGHKLEYNYISHNVYITADKQKNGIKANFKIRHNIED</u><br><u>GSVQLADHYQONTPIGDGPVLLPDNHYLSTQSALS KDPNEKRDHMLLEFVTAAGITL</u><br><u>GMDELYKGLRSRDYKDDDDKSGSVSSVPTKLEVVAATPTSLLISWDASSSSVSYYR</u><br><u>ITYGETGGNSPVQEF TVPSYYSTATISGLKPGVDY TITVYAYYWYGSPYYYWKASPIS</u><br>INYRT (N-terminal tag, ECFP-FLAG, is underlined) |

**Table S2.** Description of cell lines used, their origin and the mutational status

| Cell Line | Origin                           | RAS Mutation |
|-----------|----------------------------------|--------------|
| CFPAC-1   | Pancreatic ductal adenocarcinoma | KRAS(G12V)   |
| PANC-1    | Pancreatic ductal adenocarcinoma | KRAS(G12D)   |
| NCI-H1915 | Non-small cell lung carcinoma    | HRAS(Q61L)   |
| NCI-H1944 | Non-small cell lung carcinoma    | KRAS(G13D)   |
| NCI-H1299 | Non-small cell lung carcinoma    | NRAS(Q61K)   |
| HEC-1A    | Endometrial adenocarcinoma       | KRAS(G12D)   |
| NCI-H1792 | Lung Adenocarcinoma              | KRAS(G12C)   |
| A375      | Melanoma                         | BRAF(V600E)  |

**Table S3.** Summary of RAS-targeting biologics that can be used as genetically encoded reagents

| Name    | Platform | Isotype specificity | Mutation specificity                 | Nucleotide specificity | affinity (lowest $K_D$ or $IC_{50}$ , nM) | Epitope                             | PDB ID | Ref       |
|---------|----------|---------------------|--------------------------------------|------------------------|-------------------------------------------|-------------------------------------|--------|-----------|
| iDab#6  | VH       | none                | none                                 | GTP                    | 6                                         | SI, SII                             | 2VH5   | 1         |
| K55     | DARPin   | none                | none                                 | GTP                    | 167                                       | SI, SII                             | 5MLA   | 2         |
| RBDv1   | RBD      | RAS, RAP            | none                                 | GTP                    | 3                                         | SI                                  | 6NTC   | 3         |
| RBDv12  | RBD      | RAS, RAP            | none                                 | GTP                    | 3                                         | SI                                  | 6NTD   | 3         |
| 12VC1   | Monobody | ND                  | G12C, G12V                           | GTP                    | 25                                        | SI, SII, P-loop                     | 7L0G   | 4         |
| K27     | DARPin   | none                | none                                 | GDP                    | 3.9                                       | SI, SII                             | 5O2T   | 2         |
| R11.1.6 | Sso7d    | ND                  | preference for G12D in the GTP state | GDP                    | 3                                         | SI/SII pocket                       | 5UFE   | 5         |
| K6      | Affimer  | ND                  | ND                                   | none                   | 592*                                      | SI/SII pocket                       | 6YR8   | 6         |
| JAM20   | Monobody | none                | none                                 | GDP                    | 5                                         | SI/SII pocket                       |        | This work |
| K3      | Affimer  | KRAS                | ND                                   | none                   | 144*                                      | SII pocket                          | 6YXW   | 6         |
| R15     | Monobody | none                | fast cycling mutants (in cells)      | nucleotide free        | 28                                        | ND                                  |        | 7         |
| NS1     | Monobody | HRAS, KRAS          | none                                 | none                   | 14                                        | $\alpha 4$ - $\beta 6$ - $\alpha 5$ | 5E95   | 8         |
| K69     | Affimer  | ND                  | ND                                   | none                   | 697*                                      | $\alpha 4$ - $\beta 6$ - $\alpha 5$ | 7NY8   | 6         |
| K13     | DARPin   | KRAS                | none                                 | none                   | 127*                                      | $\alpha 3$ - $\alpha 4$             | 6H46   | 9         |
| K19     | DARPin   | KRAS                | none                                 | none                   | 7*                                        | $\alpha 3$ - $\alpha 4$             | 6H47   | 9         |

Molecules exhibiting different types of specificity are separated with thick lines. ND, not determined. \* $IC_{50}$  values.



## SI References

1. Tanaka T, Williams RL, & Rabbitts TH (2007) Tumour prevention by a single antibody domain targeting the interaction of signal transduction proteins with RAS. *EMBO J* 26:3250-3259.
2. Guillard S, *et al.* (2017) Structural and functional characterization of a DARPIn which inhibits Ras nucleotide exchange. *Nat Commun* 8:16111.
3. Wiechmann S, *et al.* (2020) Conformation-specific inhibitors of activated Ras GTPases reveal limited Ras dependency of patient-derived cancer organoids. *J Biol Chem* 295:4526-4540.
4. Teng KW, *et al.* (2021) Selective and noncovalent targeting of RAS mutants for inhibition and degradation. *Nat Commun* 12:2656.
5. Kauke MJ, *et al.* (2017) An engineered protein antagonist of K-Ras/B-Raf interaction. *Sci Rep* 7:5831.
6. Haza KZ, *et al.* (2021) RAS-inhibiting biologics identify and probe druggable pockets including an SII-alpha3 allosteric site. *Nat Commun* 12:4045.
7. Khan I, *et al.* (2022) Identification of the nucleotide-free state as a therapeutic vulnerability for inhibition of selected oncogenic RAS mutants. *Cell Rep* 38:110322.
8. Spencer-Smith R, *et al.* (2017) Inhibition of RAS function through targeting an allosteric regulatory site. *Nat Chem Biol* 13:62-68.
9. Bery N, *et al.* (2019) KRAS-specific inhibition using a DARPIn binding to a site in the allosteric lobe. *Nat Commun* 10:2607.
